# Supplementary material for: Clinical and immunological evaluation of anti-apoptosis protein, survivin-derived peptide vaccine in phase I clinical study for patients with advanced or recurrent breast cancer
Source: Springer Nature journal article supplement (doi:10.1186/1479-5876-6-24), 2008-05-10
Supplement: Additional file 1 [file 1479-5876-6-24-s1.pdf]

**Table 1 : Profiles of patients enrolled in the first protocol with survivin-2B peptide alone**

| <b>patient<br/>no.</b> | <b>age</b> | <b>sex</b> | <b>site of metastases</b>                   |
|------------------------|------------|------------|---------------------------------------------|
| <b>1</b>               | <b>60</b>  | <b>F</b>   | <b>brain</b>                                |
| <b>2</b>               | <b>42</b>  | <b>F</b>   | <b>lymph node, lung</b>                     |
| <b>3</b>               | <b>50</b>  | <b>F</b>   | <b>lymph node, bone</b>                     |
| <b>4</b>               | <b>34</b>  | <b>F</b>   | <b>lymph node, lung, liver, bone</b>        |
| <b>5</b>               | <b>71</b>  | <b>F</b>   | <b>local, lung</b>                          |
| <b>6</b>               | <b>40</b>  | <b>F</b>   | <b>lymph node</b>                           |
| <b>7</b>               | <b>70</b>  | <b>F</b>   | <b>local, brain, lung</b>                   |
| <b>8</b>               | <b>46</b>  | <b>F</b>   | <b>lymph node, brain, lung</b>              |
| <b>9</b>               | <b>58</b>  | <b>F</b>   | <b>bone</b>                                 |
| <b>10</b>              | <b>51</b>  | <b>F</b>   | <b>lymph node</b>                           |
| <b>11</b>              | <b>51</b>  | <b>F</b>   | <b>lymph node, lung, liver, bone</b>        |
| <b>12</b>              | <b>38</b>  | <b>F</b>   | <b>local, lymph node, brain, lung, bone</b> |
