# Supplementary material for: Clinical and immunological evaluation of anti-apoptosis protein, survivin-derived peptide vaccine in phase I clinical study for patients with advanced or recurrent breast cancer
Source: Springer Nature journal article supplement (doi:10.1186/1479-5876-6-24), 2008-05-10
Supplement: Additional file 2 [file 1479-5876-6-24-s2.pdf]

**Table 2 :****Profiles of patients enrolled in the second protocol with survivin-2B peptide mixed IFA**

| <b>patient<br/>no.</b> | <b>age</b> | <b>sex</b> | <b>site of metastases</b>            |
|------------------------|------------|------------|--------------------------------------|
| <b>1</b>               | <b>71</b>  | <b>F</b>   | <b>lymph node, lung, liver, bone</b> |
| <b>2</b>               | <b>52</b>  | <b>F</b>   | <b>lung, liver</b>                   |
| <b>3</b>               | <b>36</b>  | <b>F</b>   | <b>lymph node</b>                    |
| <b>4</b>               | <b>53</b>  | <b>F</b>   | <b>lymph node, lung, bone</b>        |
| <b>5</b>               | <b>47</b>  | <b>F</b>   | <b>lymph node</b>                    |
