# Supplementary material for: Clinical and immunological evaluation of anti-apoptosis protein, survivin-derived peptide vaccine in phase I clinical study for patients with advanced or recurrent breast cancer
Source: Springer Nature journal article supplement (doi:10.1186/1479-5876-6-24), 2008-05-10
Supplement: Additional file 4 [file 1479-5876-6-24-s4.pdf]

**Table 4 : Outcome in the second protocol with survivin-2B peptide mixed IFA**

| <b>patient no.</b> | <b>dose of peptide (mg)</b> | <b>vaccination times</b> | <b>adverse event</b>     | <b>Tumor marker (pre- / post-)</b> | <b>evaluation of CT image</b> | <b>DTH skin test</b> | <b>tetramer staining</b> | <b>ELISPOT assay</b> |
|--------------------|-----------------------------|--------------------------|--------------------------|------------------------------------|-------------------------------|----------------------|--------------------------|----------------------|
| 1                  | 1.0                         | 4                        | induration               | CEA (4.9ng/ml / 7.4ng/ml)          | PD                            | +                    | detected                 | -                    |
| 2                  | 1.0                         | 3                        |                          |                                    |                               |                      |                          |                      |
| 3                  | 1.0                         | 4                        | induration               | CA15-3 (26.8U/ml / 79.7U/ml)       | PD                            | -                    | detected                 | -                    |
| 4                  | 1.0                         | 4                        | general malaise          | CEA (23.2ng/ml / 33.9ng/ml)        | PD                            | -                    | detected                 | -                    |
| 5                  | 1.0                         | 4                        | general malaise<br>fever | ICTP (11.8ng/ml / 28.0ng/ml)       | PD                            | -                    | detected                 | +                    |

tumor marker : pre- : before the 1<sup>st</sup> vaccination, post : after the 4<sup>th</sup> vaccination,

evaluation of CT image : PD : progressive disease,

DTH skin test : + : positive reaction, - : negative reaction

tetramer staining : detected : an increase of twofold or more, undetected : a less than twofold increase

ELISPOT assay : + : many spots were visualized, - : spots were almost not visualized
